# Supplementary material for: Spatiotemporal profile of altered neural reactivity to food images in obesity: Reward system is altered automatically and predicts efficacy of weight loss intervention
Source: Frontiers journal article supplement (doi:10.3389/fnins.2023.948063), 2023-02-08
Supplement: Image_1.PDF [file Image_1.PDF]

## Supplementary Material

### Supplementary Figures

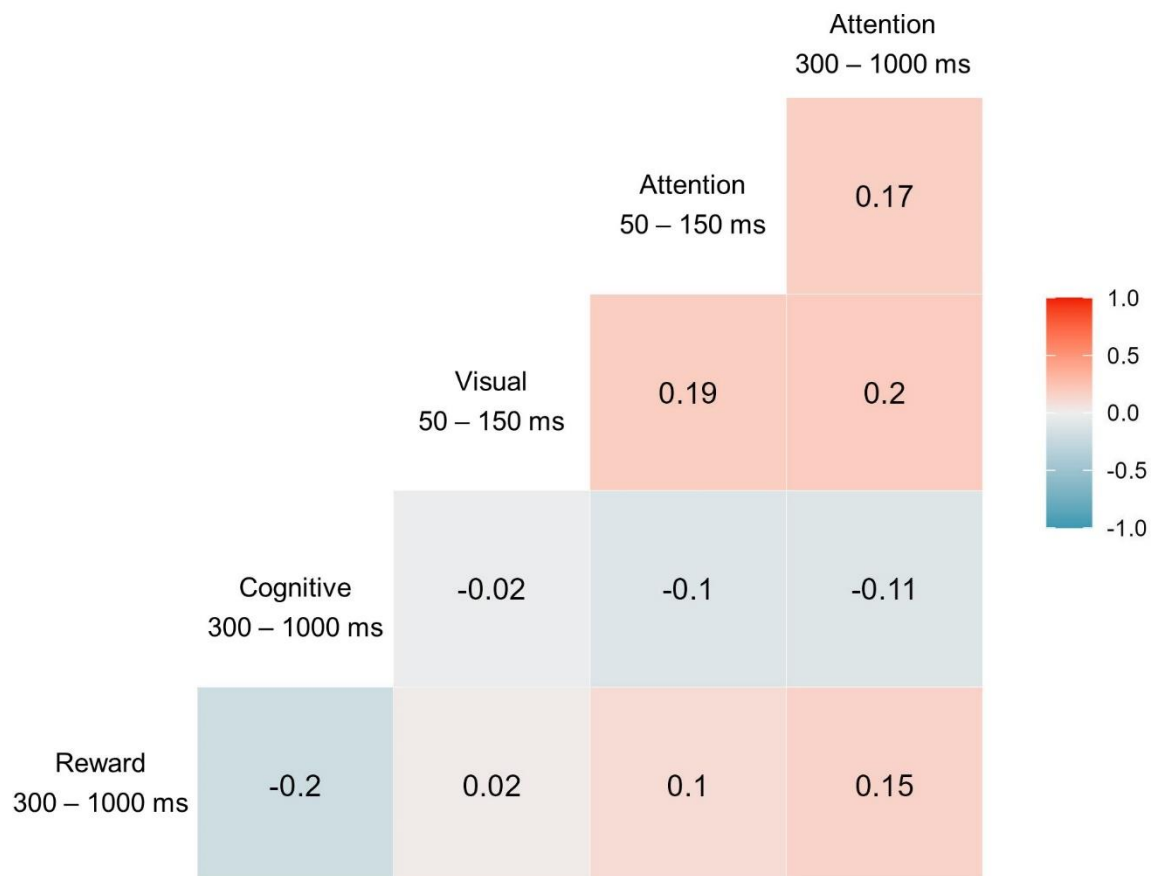

**Supplementary Figure 1.** Correlation matrix of best-fit regression model's independent variables. Correlation coefficients are color-coded and shown inside the corresponding cells.
